# Supplementary material
Source: PubMed Central journal article supplement (PMC3989357)
Supplement: chan-7-288-s01.pdf [file chan-7-288-s01.pdf]

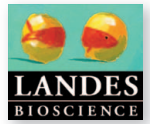

## **Supplemental Material to:**

**Alexandra Mant, Sarah Williams and Ita O'Kelly**

**Acid sensitive background potassium channels K2P3.1 and K2P9.1 undergo rapid dynamin-dependent endocytosis**

**July/August 2013; Vol 7 (Issue 4)**

**<http://dx.doi.org/10.4161/chan.25120>**

**<http://www.landesbioscience.com/journals/channels/article/25120/>**

**A**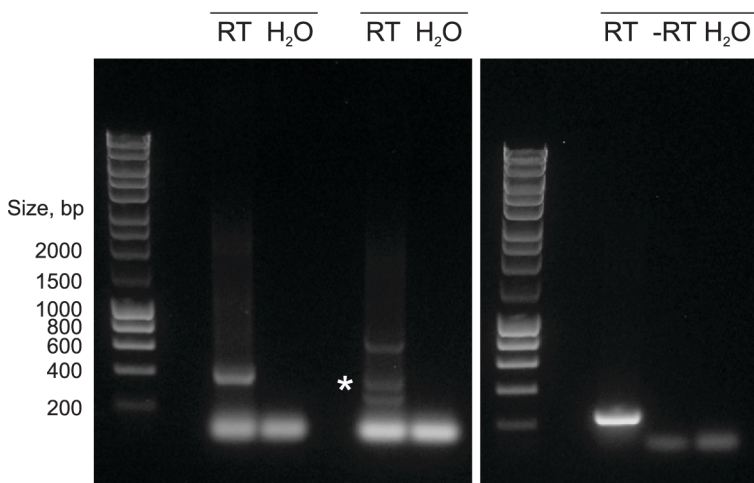**B**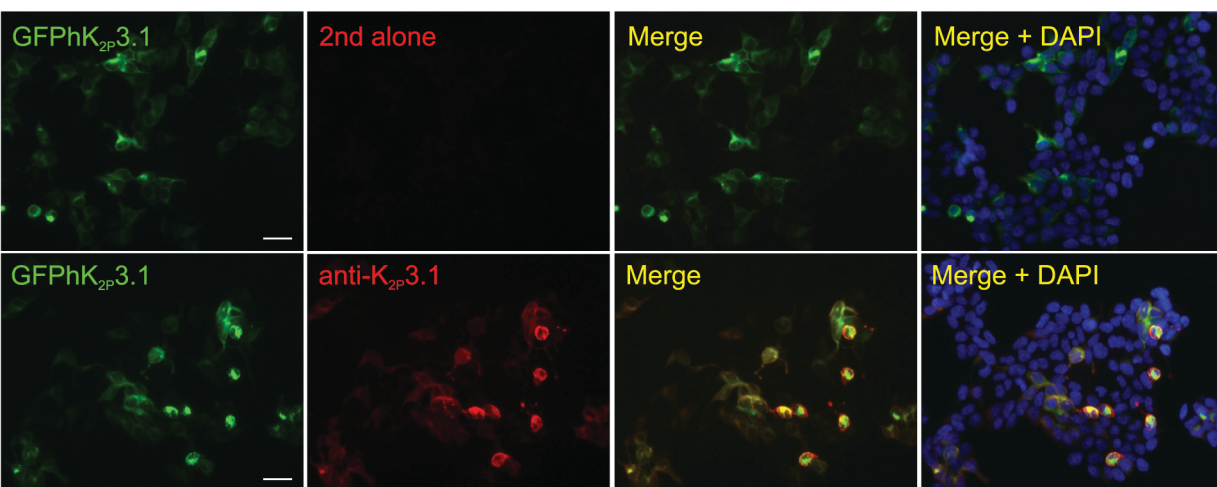**C**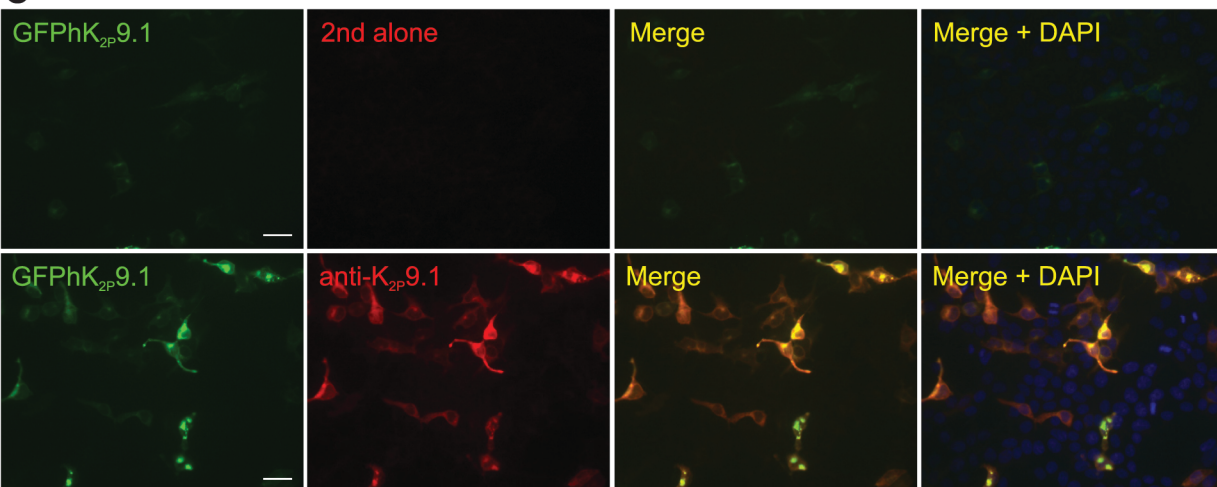

**Supplementary Figure 1 A549 cells express KCNK3 (K<sub>2P</sub>3.1) and KCNK9 (K<sub>2P</sub>9.1)**

**A** Reverse-transcription PCR was carried out using cDNA prepared from A549 cells, as described in Materials and Methods. KCNK3-specific primers amplified a 430 bp product that was sequenced and identified as the desired KCNK3 amplicon (>95% homology). Three products, including a 413 bp fragment were amplified using KCNK9-specific primers and sequenced. The middle fragment (\*) was >90% homologous to KCNK9. A 252 bp fragment from a housekeeping gene, transferrin receptor (TFRC), was amplified from the same cDNA sample. Lanes RT: reverse transcriptase included in the cDNA synthesis reaction; H<sub>2</sub>O: water instead of cDNA template; -RT: reverse transcriptase omitted during cDNA synthesis. **B, C** Commercially available antibodies detect GFP-tagged human K<sub>2P</sub>3.1 and K<sub>2P</sub>9.1 HEK293 cells were transiently transfected with plasmids encoding GFP-tagged hK<sub>2P</sub>3.1 and hK<sub>2P</sub>9.1 fusion proteins, as described in Materials and Methods. Cells were fixed and stained with antibodies directed against K<sub>2P</sub>3.1 (panels **B**) or K<sub>2P</sub>9.1 (panels **C**). No signal was detected from secondary antibody alone samples (2nd alone images). No signal could be detected in untransfected cells (Merge + DAPI images). Scale bars represent 32  $\mu$ m.

Subcellular distribution of hK<sub>2p</sub>3.1 and hK<sub>2p</sub>9.1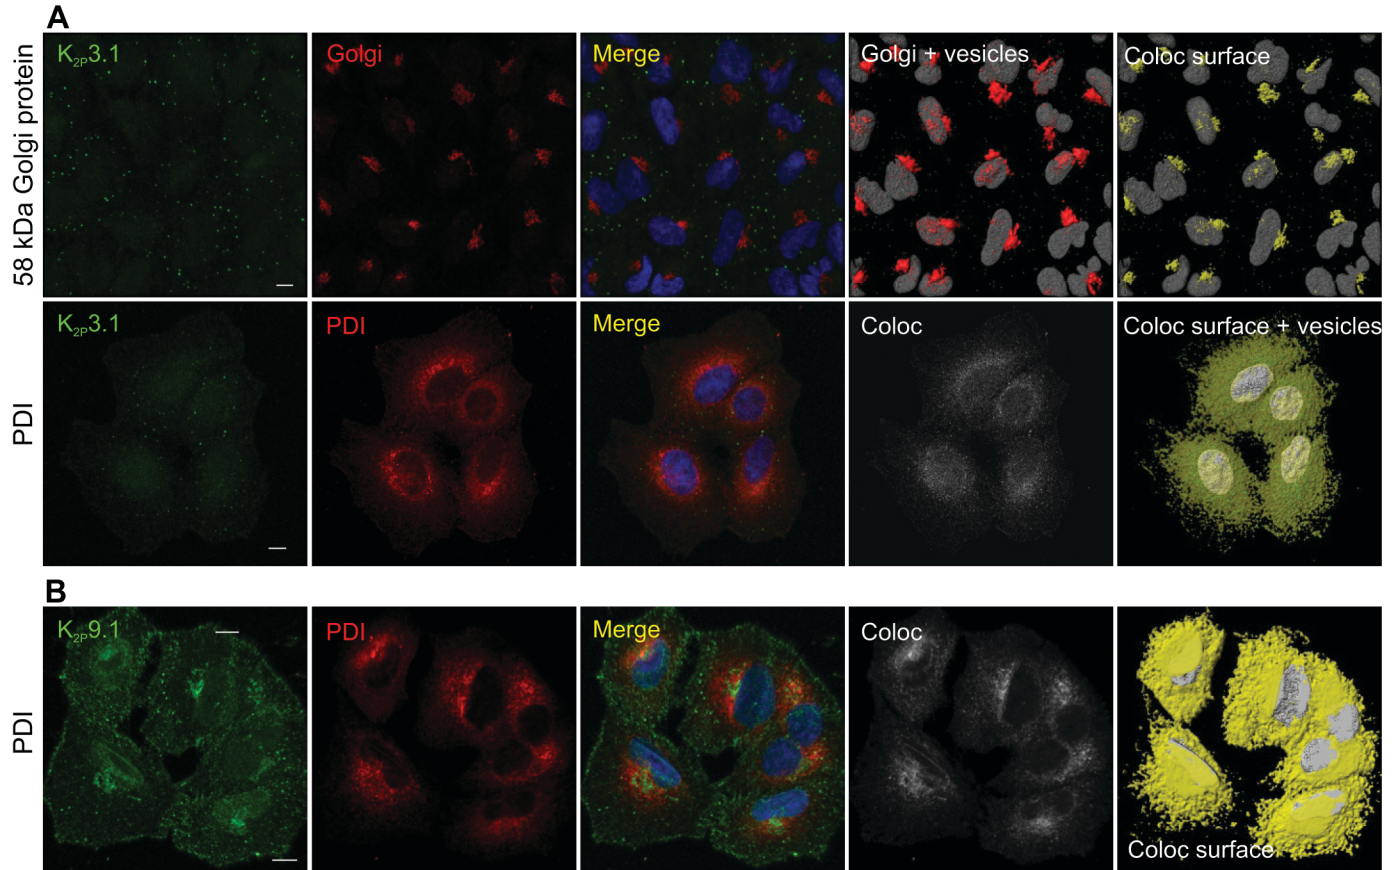Supplementary Figure 2 Subcellular distribution of hK<sub>2p</sub>3.1 and hK<sub>2p</sub>9.1

**A** K<sub>2p</sub>3.1 Golgi panels: fixed A549 cells were stained with anti-K<sub>2p</sub>3.1 (green) and anti-58 kDa Golgi protein (red). Merge: superimposed K<sub>2p</sub>3.1 and 58 kDa Golgi protein; nuclei in blue. Golgi + vesicles: 3D reconstruction of the volume occupied by the 58 kDa Golgi signal (red), together with the most prominently stained K<sub>2p</sub>3.1 spots (green); nuclei in grey. Coloc surface: 3D reconstruction of the colocalized volume of K<sub>2p</sub>3.1 and 58 kDa Golgi protein (yellow), together with the most prominently stained K<sub>2p</sub>3.1 spots (green). PDI panels: fixed A549 cells were stained with anti-K<sub>2p</sub>3.1 (green) and anti-protein disulfide isomerase (PDI, red). Merge: superimposed K<sub>2p</sub>3.1 and PDI; nuclei in blue. Coloc: colocalized K<sub>2p</sub>3.1 and PDI. The mean Mander's coefficient for hK<sub>2p</sub>3.1 with PDI is  $0.51 \pm 0.05$  SEM; n=3 fields of view. Coloc surface and vesicles: 3D reconstruction of colocalized volume of K<sub>2p</sub>3.1 and PDI (yellow), together with the most prominently stained K<sub>2p</sub>3.1 vesicles (green); nuclei in grey. **B** K<sub>2p</sub>9.1 PDI panels: fixed A549 cells were stained with anti-K<sub>2p</sub>9.1 (green) and anti-PDI (red). Merge: superimposed K<sub>2p</sub>9.1 and PDI. Coloc: colocalized K<sub>2p</sub>9.1 and PDI. The mean Mander's coefficient for hK<sub>2p</sub>9.1 with PDI is  $0.56 \pm 0.07$  SEM; n=3. Coloc surface and vesicles: 3D reconstruction of colocalized volume of K<sub>2p</sub>3.1 and PDI (yellow). Scale bars: 10  $\mu$ m. All images are whole cell projections of confocal z-stacks. Image analysis was performed using Imaris 7.6.1.
